# Supplementary material for: Transcriptomic Analysis of Shiga-Toxigenic Bacteriophage Carriage Reveals a Profound Regulatory Effect on Acid Resistance in Escherichia coli
Source: PubMed Central journal article supplement (PMC4651098; doi:10.1128/aem.02034-15), 2015-10-30
Supplement: AEM.02034-15_zam999116747so1.pdf [file AEM.02034-15_zam999116747so1.pdf]

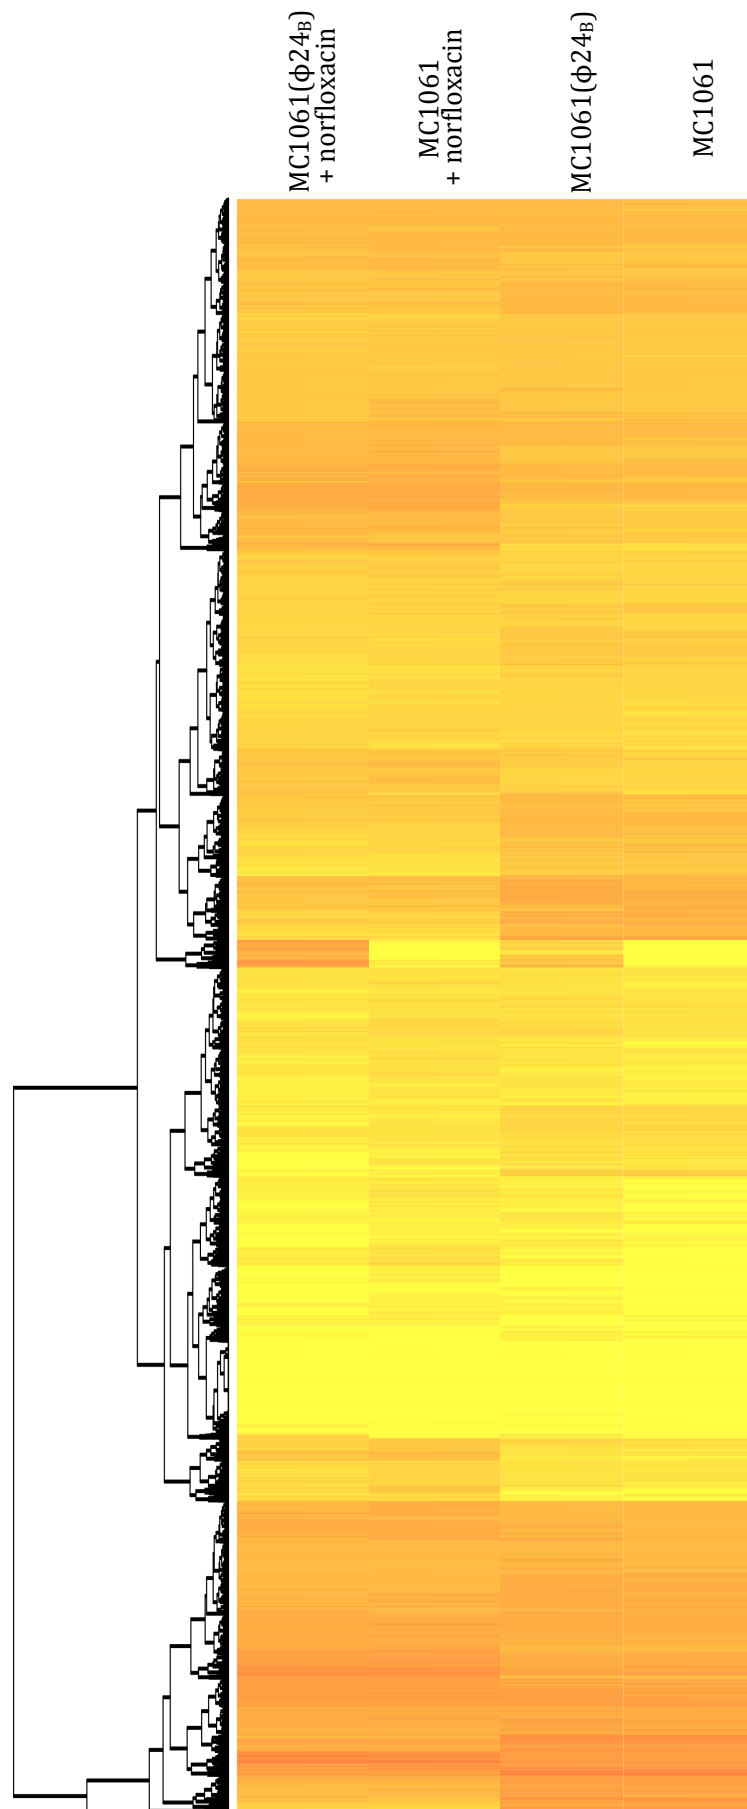

**SI Figure 1. Hierarchical cluster analysis of gene expression in MC1061 and MC1061( $\phi$ 24<sub>B</sub>) before and after norfloxacin induction.** Red and yellow indicate increased and decrease expression respectively.

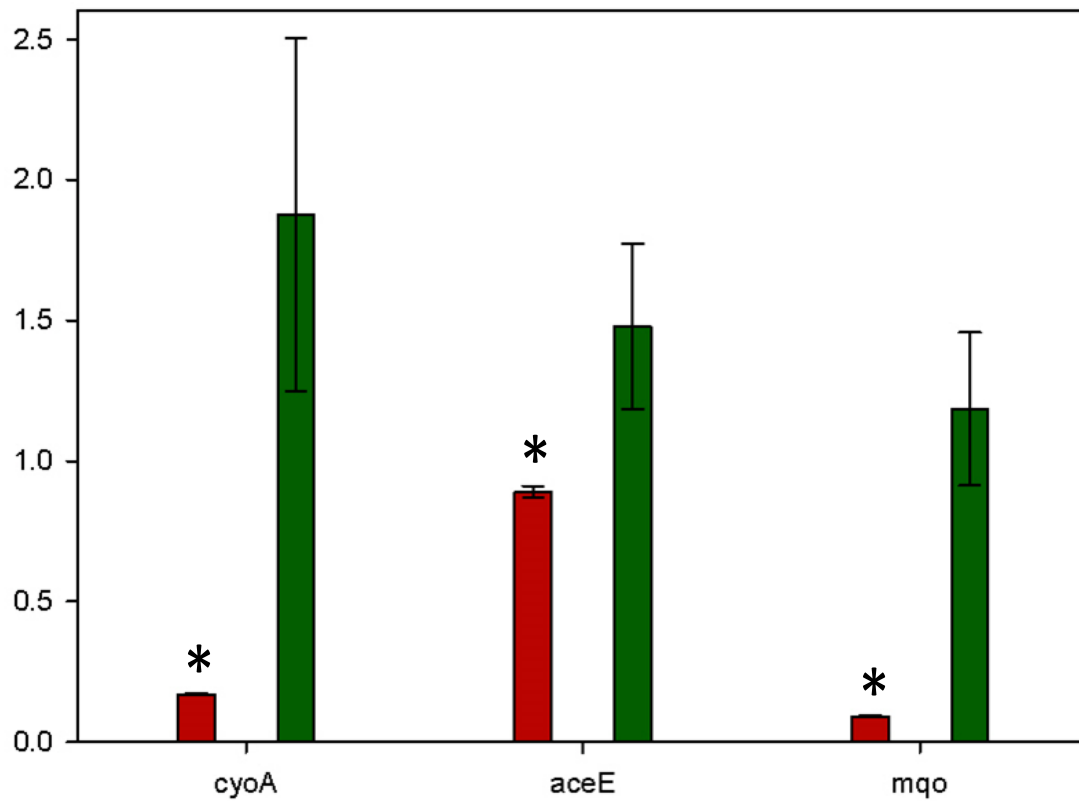

**SI Figure 2. Relative q-RT-PCR ratios of *cyoA*, *aceE* and *mgo*.** Normalized against the endogenous reference genes *pdxA* and *rraB*. **Red:** MC1061(φ24<sub>B</sub>), **green:** MC1061. Error bars represent standard error of the mean ( $n=3$ ). \* represents statistically significant values in a two-sample t-test ( $p$  value < 0.05)

**SI Table 1. Bacterial strains, plasmid and phages used in the study.**

| <i>E.coli</i> strains, plasmids and phages | Description                                               | Reference                 |
|--------------------------------------------|-----------------------------------------------------------|---------------------------|
| MC1061                                     | <i>E. coli</i> K-12 derivative                            | (1)                       |
| φ24 <sub>B</sub> ::Kan                     | Stx2-phage, Δ <i>stxA</i> <sub>2</sub> :: <i>aph3</i>     | (1)                       |
| TUV93-0                                    | EDL933 with excised Stx1 and Stx2 phages                  | (2)                       |
| pBAD/ <i>Myc</i> -His C                    | araBAD, C-myc/His6 epitope, pBR322 ori, AmR               | Invitrogen, Paisley, U.K. |
| pφ24 <sub>B</sub> -cI                      | pBAD carrying Φ24 <sub>B</sub> <i>cI</i>                  | This study                |
| pφ24 <sub>B</sub> -cIIcIII                 | pBAD carrying Φ24 <sub>B</sub> <i>cII</i> and <i>cIII</i> | This study                |

**SI Table 2. PCR and qPCR primers used in the study.**

| Oligonucleotide  | Sequence (5'-3')               | Ref                |            |
|------------------|--------------------------------|--------------------|------------|
| cI_NcoI          | CCATGGTTCAGAATGAAAAAGTG        | (3)                |            |
| cI_SalI          | GTCGACGAAGTCACGAACCTTTTCAGC    | (3)                |            |
| cII_NcoI         | CCATGGAACAAACAAGTTACAGC        | This study         |            |
| cII_SalI         | GTCGACTTAAAATTCCATTTGTATT      | This study         |            |
| cII cIII phusion | TGGAATTTTAAATGCAATATGCCATTGCAG | This study         |            |
| cIII_NcoI        | CCATGGAATATGCCATTGCAG          | This study         |            |
| cIII_SalI        | GTCGACGTCTGGATAGC              | This study         |            |
| Oligonucleotide  | Sequence (5'-3')               | Primer efficiency* | Ref        |
| gadE_F           | GTAGGCAATAAACCCCTTCAAGG        | 99.25              | This study |
| gadE_R           | TACTGATGTGATAAGGTGCC           |                    | This study |
| gadX_F           | CACAGTTGCTTACTGAGTGTA          | 99.66              | This study |
| gadX_R           | GTGATATCCACAGGATACTG           |                    | This study |
| gadC_F           | ACCGGCGTCACTCTGGA              | 101.03             | This study |
| gadC_R           | GTCATTCATCACAATATAGTG          |                    | This study |
| rraB_F           | CAGAAGAGCTGGAAGTTGAAG          | 98.02              | This study |
| rraB_R           | TTGTTCAACCTGGGCATCGAT          |                    | This study |
| pdxA_F           | GTACGGAAGAGATAGACACCAT         | 98.19              | This study |
| pdxA_R           | GCGTTATCAAGATATTTCGGCTG        |                    | This study |
| mqo_F            | CAATACTGATGCTGCCATCG           | 99.76              | This study |
| mqo_R            | CGAACTCTCCTGCGCGACAC           |                    | This study |
| cyoA_F           | CGTTGGCGATCAGATGCAG            | 99.73              | This study |
| cyoA_R           | CATCACGGAGTTGGAGGTCAC          |                    | This study |
| aceE_F           | GTCTGCAGCACGAAGATGGTC          | 102.25             | This study |
| aceE_R           | GCTGTCATCATGCATGACG            |                    | This study |
| cI_F             | GTGAGGGAACGGAGCTACAG           | 98.54              | (4)        |
| cI_R             | GCGGCCTTATGCTTTCAATG           |                    | (4)        |
| cro_F            | AAAGGGCTGTCTATAAGTGG           | 97.15              | (4)        |
| cro_R            | GCCACCAGAAATCTCTTCG            |                    | (4)        |
| 19_F             | GGTGCCGGGTGCCTC                | 98.06              | This study |
| 19_R             | GGAGGGGCGACTGG                 |                    | This study |
| 25_F             | CGTCTGCTCCACACTGG              | 98.00              | This study |
| 25_R             | CGTGACGGAAGATAACCACG           |                    | This study |
| 28_F             | CTGCTCAAAGCTTGTCGC             | 99.30              | This study |
| 28_R             | CGGAGCACCTGAATTCA              |                    | This study |

|      |                      |       |            |
|------|----------------------|-------|------------|
| 35_F | CATCACCTTTCGCCTGTGAT | 97.02 | This study |
| 35_R | CACTGCGCAATAAGGACAAT |       | This study |

\*Primer efficiency calculated applying the formula  $E=10^{(-1/\text{slope})-1}$  (5)

**SI Table 3. Complete list of bacterial genes differentially expressed in MC1061 and MC1061( $\phi$ 24<sub>B</sub>) upon treatment with norfloxacin.**

| Gene                     | Function                                                                                                                                    | Fold change MC1061 ( $\phi$ 24 <sub>B</sub> ) | P value | Fold change MC1061 | P value |
|--------------------------|---------------------------------------------------------------------------------------------------------------------------------------------|-----------------------------------------------|---------|--------------------|---------|
| <b>Genes upregulated</b> |                                                                                                                                             |                                               |         |                    |         |
| <i>entE</i>              | 2,3-dihydroxybenzoate-AMP ligase, enterobactin biosynthesis                                                                                 | 110.2                                         | 0.001   | 429.7              | 0.003   |
| <i>fhuF</i>              | Ferric iron reductase Involved in the reduction of ferric iron                                                                              | 101.4                                         | 0.001   | 124.9              | 0.011   |
| <i>entC</i>              | Isochorismate synthase, enterobactin biosynthesis                                                                                           | 101.1                                         | 0.000   | 656.6              | 0.000   |
| <i>efeU</i>              | Elemental ferrous iron uptake system                                                                                                        | 68.5                                          | 0.001   | 58.5               | 0.014   |
| <i>ybdZ</i>              | Putative cytoplasmic protein in enterobactin biosynthesis operon                                                                            | 65.0                                          | 0.001   | 241.0              | 0.005   |
| <i>entB</i>              | Isochorismatase siderophore / Apo-aryl carrier domain, enterobactin biosynthesis                                                            | 48.9                                          | 0.002   | 116.7              | 0.006   |
| <i>fes</i>               | Enterobactin/Enterochelin esterase, enterobactin biosynthesis                                                                               | 47.4                                          | 0.001   | 128.0              | 0.004   |
| <i>fecR</i>              | Iron(III) dicitrate transmembrane sensor protein                                                                                            | 37.8                                          | 0.002   | 31.6               | 0.038   |
| <i>yjcB</i>              | Uncharacterized protein                                                                                                                     | 34.4                                          | 0.002   | 28.2               | 0.028   |
| <i>entH</i>              | Thioesterase, enterobactin biosynthesis                                                                                                     | 32.6                                          | 0.002   | 63.6               | 0.012   |
| <i>efeO</i>              | Elemental ferrous iron uptake system                                                                                                        | 28.2                                          | 0.003   | 36.0               | 0.028   |
| <i>fepA</i>              | Outer membrane receptor for ferric enterobactin and colicins B, D                                                                           | 26.9                                          | 0.007   | 89.3               | 0.046   |
| <i>entS</i>              | Enterobactin exporter, iron-regulated                                                                                                       | 26.7                                          | 0.003   | 80.4               | 0.009   |
| <i>umuD</i>              | Following induction of the SOS response, UmuD is proteolytically processed into UmuD' in a cleavage reaction that depends on activated RecA | 25.8                                          | 0.005   | 25.8               | 0.005   |
| <i>umuC</i>              | Error-prone, lesion bypass DNA polymerase V. Binds to processed UmuD protein to form functional DNA pol V (UmuD'2UmuC                       | 24.5                                          | 0.005   | 82.3               | 0.010   |
| <i>fhuA</i>              | Ferrichrome-iron receptor. Acts as a receptor for bacteriophage T5, T1, phi80 and colicin M.                                                | 24.1                                          | 0.006   | 104.7              | 0.007   |
| <i>entF</i>              | 2,3-dihydro-2,3-dihydroxybenzoate dehydrogenase, enterobactin biosynthesis                                                                  | 23.6                                          | 0.011   | 52.7               | 0.031   |
| <i>cirA</i>              | Colicin I receptor precursor                                                                                                                | 22.8                                          | 0.007   | 106.4              | 0.016   |
| <i>recX</i>              | Modulates RecA activity through direct physical interaction. May have a regulatory role during the SOS response                             | 21.8                                          | 0.009   | 68.5               | 0.019   |

|                   |                                                                                       |      |       |       |       |
|-------------------|---------------------------------------------------------------------------------------|------|-------|-------|-------|
| <i>yegD</i>       | Putative heat shock protein                                                           | 20.3 | 0.012 | 45.4  | 0.039 |
| <i>fhuC</i>       | Ferric hydroxamate ABC transporter, ATP-binding protein                               | 20.2 | 0.008 | 24.1  | 0.034 |
| <i>entD</i>       | 4'-phosphopantetheinyl transferase, enterobactin biosynthesis                         | 19.5 | 0.007 | 135.4 | 0.004 |
| <i>entA</i>       | 2,3-dihydro-2,3-dihydroxybenzoate dehydrogenase, enterobactin biosynthesis            | 18.5 | 0.009 | 65.4  | 0.013 |
| <i>fepB</i>       | ferric enterobactin (enterochelin) binding protein                                    | 18.0 | 0.009 | 34.4  | 0.031 |
| <i>fecl</i>       | RNA polymerase sigma factor                                                           | 17.4 | 0.014 | 36.9  | 0.039 |
| <i>fepD</i>       | Ferric enterobactin transport system permease                                         | 17.2 | 0.008 | 47.6  | 0.021 |
| <i>cspH</i>       | Cold shock protein                                                                    | 16.7 | 0.058 | 13.0  | 0.058 |
| <i>fepC</i>       | Ferric enterobactin transport ATP-binding protein                                     | 16.7 | 0.009 | 39.9  | 0.030 |
| <i>pstS</i>       | Phosphate ABC transporter, periplasmic phosphate- binding protein                     | 16.3 | 0.020 | 26.5  | 0.039 |
| <i>nrdF</i>       | Ribonucleotide reductase of class Ib (aerobic), beta subunit                          | 16.2 | 0.009 | 39.3  | 0.028 |
| <i>nrdE</i>       | Ribonucleotide reductase of class Ib (aerobic), alpha subunit                         | 16.0 | 0.011 | 67.1  | 0.015 |
| <i>fepG</i>       | Ferric enterobactin transport system permease                                         | 15.7 | 0.010 | 145.3 | 0.007 |
| <i>pdhR</i>       | Transcriptional repressor for pyruvate dehydrogenase complex                          | 14.1 | 0.043 | 7.3   | 0.809 |
| <i>rhIE</i>       | ATP-dependent RNA helicase                                                            | 13.7 | 0.047 | 9.7   | 0.277 |
| <i>recA</i>       | DNA strand exchange and recombination protein                                         | 13.7 | 0.576 | 18.7  | 0.706 |
| <i>recN</i>       | DNA repair protein                                                                    | 12.3 | 0.074 | 16.5  | 1.000 |
| <i>Ferredoxin</i> | iron-sulfur proteins that transfer electrons in a wide variety of metabolic reactions | 11.8 | 0.020 | 25.9  | 0.025 |
| <i>wcaF</i>       | colanic acid biosynthesis acetyltransferase                                           | 11.6 | 0.111 | 0.5   | 0.436 |
| <i>cspA</i>       | Cold-shock DEAD-box protein A                                                         | 11.4 | 0.558 | 2.5   | 0.842 |
| <i>nrdI</i>       | Electron transport system for the ribonucleotide reductase system                     | 11.2 | 0.015 | 67.1  | 0.006 |
| <i>hycA</i>       | Formate hydrogenlyase regulatory protein                                              | 10.6 | 0.021 | 39.2  | 0.024 |
| <i>fhuB</i>       | Ferric hydroxamate ABC transporter, permease component                                | 10.3 | 0.024 | 12.1  | 0.864 |
| <i>htpX</i>       | heat shock membrane protein protein                                                   | 10.1 | 0.213 | 1.1   | 0.197 |
| <i>phnG</i>       | Component of a carbon-phosphorous lyase enzyme                                        | 10.0 | 0.033 | 31.0  | 0.020 |
| <i>suhB</i>       | Inositol-1-monophosphatase                                                            | 9.7  | 0.035 | 68.5  | 0.010 |
| <i>carA</i>       | Carbamoyl-phosphate synthase small chain                                              | 9.5  | 0.041 | 18.6  | 0.684 |
| <i>iscA</i>       | Iron binding protein for iron-sulfur cluster assembly                                 | 9.4  | 0.068 | 4.2   | 0.775 |
| <i>rnpA</i>       | Ribonuclease P protein component                                                      | 9.2  | 0.092 | 5.8   | 0.467 |
| <i>pspD</i>       | Phage shock protein D                                                                 | 9.1  | 0.043 | 1.4   | 0.233 |
| <i>mdtI</i>       | spermidine efflux transporter                                                         | 9.0  | 0.165 | 0.1   | 0.222 |

|             |                                                                   |     |       |      |       |
|-------------|-------------------------------------------------------------------|-----|-------|------|-------|
| <i>nrdH</i> | Electron transport system for the ribonucleotide reductase system | 8.9 | 0.002 | 65.7 | 0.018 |
| <i>ansP</i> | L-asparagine permease                                             | 8.8 | 0.046 | 7.4  | 0.080 |
| <i>fis</i>  | DNA-binding transcriptional dual regulator                        | 8.6 | 0.079 | 14.8 | 0.289 |
| <i>hemP</i> | Hemin uptake protein                                              | 8.5 | 0.047 | 16.0 | 0.835 |
| <i>apt</i>  | Adenine phosphoribosyltransferase                                 | 8.4 | 0.056 | 11.6 | 0.707 |
| <i>stfA</i> | Major fimbrial subunit                                            | 8.4 | 0.085 | 11.0 | 0.433 |
| <i>lscS</i> | Cysteine desulfurase                                              | 8.2 | 0.006 | 6.9  | 1.000 |
| <i>queD</i> | 6-carboxy-5,6,7,8-tetrahydropterin synthase                       | 8.1 | 0.050 | 5.2  | 1.000 |
| <i>rpoA</i> | DNA-directed RNA polymerase alpha subunit                         | 7.9 | 0.328 | 4.8  | 0.916 |
| <i>ycfS</i> | L,D-transpeptidase                                                | 7.8 | 0.065 | 2.3  | 0.829 |
| <i>cyoD</i> | Cytochrome O ubiquinol oxidase subunit IV                         | 7.7 | 0.083 | 2.1  | 0.920 |
| <i>cyoA</i> | Cytochrome O ubiquinol oxidase subunit I                          | 7.7 | 0.084 | 1.8  | 0.750 |
| <i>phnD</i> | Phosphonate ABC transporter                                       | 7.6 | 0.038 | 98.2 | 0.008 |
| <i>uvrB</i> | Excinuclease ABC subunit B                                        | 7.5 | 0.309 | 6.6  | 0.647 |
| <i>plsX</i> | Phosphate:acyl-ACP acyltransferase                                | 7.1 | 0.110 | 4.5  | 1.000 |
| <i>cyoC</i> | Cytochrome O ubiquinol oxidase subunit III                        | 7.1 | 0.105 | 1.5  | 0.750 |
| <i>norR</i> | transcriptional activator                                         | 7.1 | 0.066 | 2.1  | 0.414 |
| <i>plsX</i> | Long-chain fatty acid transport protein                           | 7.1 | 0.090 | 4.5  | 0.475 |
| <i>pyrF</i> | Orotidine 5'-phosphate decarboxylase                              | 7.1 | 0.074 | 12.3 | 0.669 |
| <i>acfD</i> | Accessory colonization factor                                     | 7.0 | 0.100 | 1.9  | 0.678 |
|             | LysR family transcriptional regulator STM2281                     | 7.0 | 0.040 | 35.0 | 0.013 |
| <i>cyoB</i> | Cytochrome O ubiquinol oxidase subunit II                         | 7.0 | 0.114 | 1.8  | 0.207 |
| <i>ibpB</i> | 16 kDa heat shock protein B                                       | 6.9 | 0.069 | 7.3  | 0.291 |
| <i>phnC</i> | Phosphonate ABC transporter ATP-binding protein                   | 6.8 | 0.068 | 78.0 | 0.904 |
| <i>rnfD</i> | Electron transport complex protein                                | 6.7 | 0.073 | 4.0  | 0.927 |
| <i>gidC</i> | Inner membrane protein translocase                                | 6.6 | 0.401 | 4.3  | 0.349 |
| <i>rph</i>  | Ribonuclease PH                                                   | 6.6 | 0.087 | 5.8  | 0.545 |
| <i>cspl</i> | Cold shock protein                                                | 6.6 | 0.072 | 4.7  | 0.895 |
| <i>zraS</i> | Sensor protein of zinc sigma-54-dependent two- component system   | 6.6 | 0.082 | 0.6  | 0.554 |
| <i>bioB</i> | Biotin synthase                                                   | 6.5 | 0.071 | 4.8  | 0.973 |
| <i>kdpA</i> | Potassium-transporting ATPase A chain                             | 6.5 | 0.072 | 7.9  | 0.910 |
| <i>dinB</i> | DNA polymerase IV                                                 | 6.5 | 0.102 | 6.5  | 0.637 |
| <i>fecC</i> | Iron(III) dicitrate transport system permease protein             | 6.5 | 0.073 | 12.0 | 0.298 |
| <i>wcaB</i> | Colanic acid biosynthesis acetyltransferase                       | 6.4 | 0.266 | 8.0  | 0.976 |

|             |                                                                   |     |       |      |       |
|-------------|-------------------------------------------------------------------|-----|-------|------|-------|
| <i>hold</i> | DNA polymerase III psi subunit                                    | 6.4 | 0.082 | 6.9  | 0.559 |
| <i>hscB</i> | Chaperone protein                                                 | 6.3 | 0.113 | 4.8  | 0.913 |
| <i>mrda</i> | Penicillin-binding protein 2                                      | 6.3 | 0.120 | 5.3  | 0.448 |
| <i>ssb</i>  | Single-stranded DNA-binding protein                               | 6.3 | 0.167 | 2.1  | 0.948 |
| <i>ligT</i> | 2'-5' RNA ligase                                                  | 6.3 | 0.074 | 2.7  | 0.500 |
| <i>kdpB</i> | Potassium-transporting ATPase B chain                             | 6.2 | 0.082 | 2.8  | 0.836 |
| <i>typA</i> | GTP-binding protein TypA/BipA                                     | 6.1 | 0.329 | 2.7  | 0.604 |
| <i>cspB</i> | Cold shock protein                                                | 6.0 | 0.099 | 23.4 | 0.206 |
| <i>piuC</i> | Iron-uptake factor                                                | 6.0 | 0.086 | 17.3 | 0.516 |
| <i>cmk</i>  | Cytidylate kinase                                                 | 6.0 | 0.130 | 8.2  | 0.753 |
| <i>iscU</i> | Iron-sulfur cluster assembly scaffold protein                     | 5.9 | 0.128 | 7.5  | 0.715 |
| <i>betT</i> | High-affinity choline uptake protein                              | 5.9 | 0.119 | 5.5  | 0.764 |
| <i>betI</i> | HTH-type transcriptional regulator                                | 5.9 | 0.125 | 3.3  | 0.889 |
| <i>zraR</i> | Response protein of zinc sigma-54-dependent two- component system | 5.8 | 0.085 | 1.0  | 0.826 |
| <i>fusA</i> | Translation elongation factor G                                   | 5.8 | 0.252 | 3.4  | 0.605 |
| <i>phnC</i> | Phosphonate ABC transporter                                       | 5.3 | 0.065 | 78.0 | 0.012 |
| <i>piuC</i> | Iron-uptake factor                                                | 4.6 | 0.086 | 17.4 | 0.047 |
| <i>yoaA</i> | DinG family ATP-dependent helicase                                | 4.4 | 0.125 | 5.5  | 0.989 |
| <i>cynT</i> | Carbonic anhydrase                                                | 4.3 | 0.132 | 6.2  | 0.696 |
| <i>cspF</i> | Cold shock protein                                                | 4.3 | 0.092 | 20.8 | 0.412 |
| <i>betA</i> | Choline dehydrogenase                                             | 4.3 | 0.135 | 2.9  | 0.586 |
| <i>aceF</i> | Dihydrolipoamide dehydrogenase                                    | 4.3 | 0.368 | 3.6  | 0.822 |
| <i>nth</i>  | Endonuclease III                                                  | 4.2 | 0.093 | 4.1  | 0.870 |
| <i>glpE</i> | Thiosulfate sulfurtransferase                                     | 4.2 | 0.097 | 2.7  | 0.592 |
| <i>rnfE</i> | Electron transport complex protein                                | 4.2 | 0.096 | 2.9  | 0.295 |
| <i>kdpF</i> | Potassium-transporting ATPase C chain                             | 4.2 | 0.097 | 3.5  | 0.726 |
| <i>hscA</i> | Chaperone protein                                                 | 4.1 | 0.144 | 2.9  | 0.627 |
| <i>cyoE</i> | Heme O synthase, protoheme IX farnesyltransferase                 | 4.1 | 0.139 | 1.8  | 0.127 |
| <i>dgoT</i> | D-galactonate transporter                                         | 4.1 | 0.114 | 4.4  | 0.366 |
| <i>betB</i> | Betaine aldehyde dehydrogenase                                    | 4.0 | 0.146 | 3.4  | 0.891 |
| <i>slp</i>  | Starvation lipoprotein Slp paralog                                | 4.0 | 0.115 | 4.2  | 0.998 |
|             | Protein Implicated in DNA repair function with RecA and MutS      | 4.0 | 0.117 | 7.1  | 0.685 |
| <i>phoH</i> | Phosphate starvation-inducible protein                            | 3.9 | 0.107 | 3.1  | 0.063 |
| <i>pstB</i> | Phosphate transport ATP-binding protein                           | 3.9 | 0.129 | 5.2  | 0.837 |



|                            |                                                                             |       |       |       |       |
|----------------------------|-----------------------------------------------------------------------------|-------|-------|-------|-------|
| <i>ruvC</i>                | Crossover junction endodeoxyribonuclease                                    | 3.9   | 0.127 | 3.0   | 0.896 |
| <i>sixA</i>                | Phosphohistidine phosphatase                                                | 3.8   | 0.134 | 3.1   | 0.508 |
| <i>speE</i>                | Spermidine synthase                                                         | 3.8   | 0.148 | 3.7   | 0.584 |
| <i>fecB</i>                | Iron(III) dicitrate transport system                                        | 3.7   | 0.120 | 19.6  | 0.047 |
| <i>hycC</i>                | Formate hydrogen lyase                                                      | 3.7   | 0.117 | 23.4  | 0.041 |
| <i>hycB</i>                | Formate hydrogen lyase                                                      | 3.7   | 0.136 | 31.1  | 0.039 |
| <i>rnfG</i>                | Electron transport complex protein                                          | 3.5   | 0.095 | 2.4   | 0.411 |
|                            | proteinase inhibitor                                                        | 3.2   | 0.686 | 42.0  | 0.028 |
| <i>hycD</i>                | Formate hydrogen lyase                                                      | 3.0   | 0.168 | 16.3  | 0.049 |
| <i>phnH</i>                | Component of a carbon-phosphorous lyase enzyme                              | 2.5   | 0.237 | 78.0  | 0.003 |
| <i>phnF</i>                | Transcriptional regulator of phosphonate uptake                             | 2.3   | 0.305 | 92.0  | 0.009 |
| <i>ygeP</i>                | Uncharacterized protein                                                     | 2.1   | 0.281 | 28.4  | 0.045 |
| <i>phnE</i>                | Phosphonate ABC transporter                                                 | 2.0   | 0.369 | 115.0 | 0.017 |
| <i>phnI</i>                | Component of a carbon-phosphorous lyase enzyme                              | 1.8   | 0.358 | 82.5  | 0.011 |
| <i>phnK</i>                | Component of a carbon-phosphorous lyase enzyme                              | 1.5   | 0.494 | 42.5  | 0.019 |
| <b>Genes downregulated</b> |                                                                             |       |       |       |       |
| <i>gutA</i>                | PTS system, glucitol/sorbitol-specific IIA component                        | 202.5 | 0.000 | 169.5 | 0.000 |
| <i>malE</i>                | Maltose/maltodextrin ABC transporter, substrate binding periplasmic protein | 162.7 | 0.975 | 413.4 | 0.974 |
| <i>gutD</i>                | Sorbitol-6-phosphate 2-dehydrogenase                                        | 157.3 | 0.988 | 138.5 | 0.004 |
| <i>malK</i>                | Maltose/maltodextrin transport ATP-binding protein                          | 143.9 | 0.100 | 251.2 | 0.001 |
| <i>srlE</i>                | PTS system, glucitol/sorbitol-specific IIB component                        | 138.9 | 0.990 | 197.9 | 0.002 |
| <i>lamB</i>                | Maltoporin                                                                  | 115.3 | 0.982 | 254.5 | 0.956 |
| <i>treB</i>                | PTS system, trehalose-specific IIB component                                | 113.8 | 0.934 | 147.6 | 0.944 |
| <i>treC</i>                | Trehalose-6-phosphate hydrolase                                             | 111.2 | 0.972 | 174.1 | 0.966 |
| <i>ompW</i>                | Outer membrane protein W precursor                                          | 109.4 | 0.986 | 66.6  | 0.007 |
| <i>fliA</i>                | RNA polymerase sigma factor for flagellar operon                            | 104.0 | 0.005 | 141.0 | 0.002 |
| <i>fliL</i>                | Flagellar biosynthesis protein                                              | 99.0  | 0.005 | 28.4  | 0.010 |
| <i>tnaA</i>                | Tryptophanase                                                               | 98.6  | 0.837 | 658.6 | 0.919 |
| <i>malF</i>                | Maltose/maltodextrin ABC transporter, permease protein                      | 94.0  | 0.037 | 91.8  | 0.004 |
| <i>gatC</i>                | PTS system, galactitol-specific IIB component                               | 92.0  | 0.004 | 99.4  | 0.001 |
| <i>ygeV</i>                | Uncharacterized sigma-54-dependent transcriptional regulator                | 86.2  | 0.005 | 48.0  | 0.004 |
|                            | Pyridine nucleotide-disulphide oxidoreductase family                        | 83.1  | 0.005 | 52.2  | 0.004 |

|              |                                                                             |      |       |       |       |
|--------------|-----------------------------------------------------------------------------|------|-------|-------|-------|
| <i>ansA</i>  | L-asparaginase                                                              | 77.3 | 0.959 | 60.1  | 0.676 |
| <i>malM</i>  | Maltose operon periplasmic protein                                          | 76.5 | 0.048 | 71.2  | 0.004 |
| <i>tnaB</i>  | tryptophan permease                                                         | 75.5 | 0.314 | 670.0 | 0.955 |
| <i>cstA</i>  | Carbon starvation protein A paralog                                         | 73.0 | 0.981 | 77.6  | 0.274 |
| <i>glpT</i>  | Glycerol-3-phosphate transporte                                             | 66.1 | 0.779 | 80.8  | 0.010 |
| <i>gatD</i>  | Galactitol-1-phosphate 5-dehydrogenase                                      | 62.6 | 0.010 | 86.3  | 0.010 |
| <i>hybA</i>  | Hydrogenase-2 operon protein                                                | 62.3 | 0.032 | 55.9  | 0.015 |
| <i>malG</i>  | Maltose/maltodextrin ABC transporter, permease protein                      | 59.8 | 0.030 | 46.5  | 0.018 |
| <i>manX</i>  | PTS system, mannose-specific IIB component                                  | 59.1 | 0.915 | 42.6  | 0.020 |
| <i>psuG</i>  | Pseudouridine 5'-phosphate glycosidase                                      | 58.5 | 0.009 | 7.9   | 0.111 |
| <i>glpQ</i>  | Glycerophosphoryl diester phosphodiesterase                                 | 57.8 | 0.967 | 26.6  | 0.033 |
| <i>preA</i>  | Dihydropyrimidine dehydrogenase                                             | 57.0 | 0.010 | 65.6  | 0.013 |
| <i>cadB</i>  | Lysine/cadaverine antiporter membrane protein                               | 55.3 | 0.008 | 14.1  | 0.062 |
| <i>potD</i>  | periplasmic spermidine putrescine-binding protein                           | 54.8 | 0.018 | 20.3  | 0.043 |
| <i>tdcD</i>  | propionate/acetate kinase                                                   | 52.5 | 0.010 | 73.6  | 0.011 |
| <i>GALNS</i> | N-acetylgalactosamine 6-sulfate sulfatase                                   | 51.4 | 0.011 | 31.9  | 0.027 |
| <i>gudP</i>  | D-galactarate permease                                                      | 51.3 | 0.010 | 27.2  | 0.011 |
| <i>aphA</i>  | periplasmic phosphatase/phosphotransferase                                  | 47.5 | 0.011 | 26.3  | 0.033 |
| <i>gadC</i>  | glutamate/gamma-aminobutyrate antiporter                                    | 46.9 | 0.938 | 7.3   | 0.111 |
| <i>dmsA</i>  | Anaerobic dimethyl sulfoxide reductase chain A                              | 46.7 | 0.239 | 64.2  | 0.013 |
| <i>tdcC</i>  | L-threonine transporter                                                     | 45.1 | 0.037 | 21.2  | 0.041 |
| <i>manY</i>  | PTS system, mannose-specific IIC component                                  | 44.3 | 0.926 | 64.2  | 0.013 |
| <i>garL</i>  | 2-dehydro-3-deoxyglucarate aldolase                                         | 44.0 | 0.013 | 32.7  | 0.026 |
| <i>dmsB</i>  | Anaerobic dimethyl sulfoxide reductase chain B                              | 43.6 | 0.044 | 74.7  | 0.011 |
| <i>mglB</i>  | D-galactose-binding periplasmic protein                                     | 43.1 | 0.053 | 46.6  | 0.018 |
| <i>nanA</i>  | N-acetylneuraminate lyase                                                   | 42.9 | 0.117 | 25.6  | 0.034 |
| <i>ykgE</i>  | L-lactate dehydrogenase, Fe-S oxidoreductase subunit                        | 41.8 | 0.013 | 57.8  | 0.015 |
| <i>tdcB</i>  | Threonine dehydratase                                                       | 41.3 | 0.027 | 25.4  | 0.034 |
| <i>lsrB</i>  | Autoinducer 2 (AI-2) ABC transport system, periplasmic AI-2 binding protein | 40.7 | 0.013 | 23.4  | 0.037 |
| <i>xylF</i>  | Xylose ABC transporter periplasmic protein                                  | 40.5 | 0.015 | 11.1  | 0.079 |
| <i>gatC</i>  | PTS system, galactitol-specific IIA component                               | 39.7 | 0.028 | 28.9  | 0.010 |
| <i>potC</i>  | Spermidine Putrescine ABC transporter permease                              | 38.0 | 0.018 | 18.4  | 0.047 |
| <i>yneH</i>  | Glutaminase                                                                 | 36.9 | 0.083 | 38.5  | 0.022 |
| <i>fadH</i>  | 2,4-dienoyl-CoA reductase [NADPH]                                           | 36.8 | 0.018 | 2.1   | 0.415 |

|             |                                                                                              |      |       |      |       |
|-------------|----------------------------------------------------------------------------------------------|------|-------|------|-------|
| <i>galT</i> | Galactose-1-phosphate uridylyltransferase                                                    | 36.3 | 0.843 | 19.0 | 0.046 |
| <i>ybaT</i> | Inner membrane transport protein                                                             | 34.7 | 0.090 | 24.7 | 0.035 |
| <i>hybB</i> | Ni/Fe-hydrogenase 2 B-type cytochrome subunit                                                | 33.8 | 0.086 | 34.8 | 0.025 |
| <i>galK</i> | Galactokinase                                                                                | 33.7 | 0.164 | 30.6 | 0.028 |
| <i>caiF</i> | Transcriptional activatory protein CaiF                                                      | 32.8 | 0.000 | 37.2 | 0.008 |
| <i>ldcC</i> | Lysine decarboxylase                                                                         | 32.1 | 0.028 | 11.7 | 0.075 |
| <i>flgB</i> | Flagellar basal-body rod protein                                                             | 31.8 | 0.019 | 43.6 | 0.020 |
| <i>nanT</i> | Sialic acid transporter                                                                      | 30.9 | 0.064 | 8.0  | 0.109 |
| <i>cspD</i> | Cold shock protein                                                                           | 30.9 | 0.250 | 38.1 | 0.023 |
| <i>lsrF</i> | Autoinducer 2 (AI-2) aldolase                                                                | 30.8 | 0.021 | 20.6 | 0.042 |
| <i>uspF</i> | Universal stress protein F                                                                   | 29.8 | 0.042 | 16.4 | 0.053 |
| <i>patD</i> | 4-aminobutyraldehyde dehydrogenase                                                           | 29.4 | 0.051 | 22.8 | 0.038 |
| <i>aldB</i> | Aldehyde dehydrogenase B                                                                     | 28.6 | 0.102 | 29.5 | 0.029 |
| <i>gatZ</i> | Tagatose-6-phosphate kinase                                                                  | 27.8 | 0.886 | 25.8 | 0.034 |
|             | DUF1440 domain-containing membrane protein                                                   | 27.7 | 0.028 | 23.4 | 0.037 |
| <i>potA</i> | Putrescine transport ATP-binding protein                                                     | 27.6 | 0.029 | 37.5 | 0.023 |
| <i>uspD</i> | Universal stress protein D                                                                   | 26.6 | 0.027 | 16.5 | 0.053 |
| <i>idnD</i> | L-idonate 5-dehydrogenase                                                                    | 26.5 | 0.033 | 13.1 | 0.028 |
| <i>garD</i> | D-galactarate dehydratase                                                                    | 26.3 | 0.047 | 25.4 | 0.034 |
| <i>ftnB</i> | Ferritin-like protein                                                                        | 25.5 | 0.041 | 35.3 | 0.024 |
| <i>flgE</i> | Flagellar hook protein                                                                       | 25.0 | 0.051 | 46.9 | 0.006 |
| <i>tdcF</i> | Hypothetical protein TdcF in cluster with anaerobic degradation of L-threonine to propionate | 24.8 | 0.029 | 26.1 | 0.033 |
| <i>xynT</i> | Xyloside transporter                                                                         | 24.8 | 0.033 | 22.3 | 0.013 |
|             | Putative fimbrial-like protein                                                               | 24.5 | 0.039 | 7.5  | 0.065 |
| <i>fliM</i> | Flagellar motor switch protein                                                               | 24.3 | 0.030 | 15.1 | 0.030 |
| <i>dmsC</i> | Anaerobic dimethyl sulfoxide reductase chain C                                               | 23.9 | 0.061 | 37.4 | 0.007 |
| <i>yagH</i> | Beta-xylosidase                                                                              | 23.0 | 0.042 | 17.3 | 0.020 |
| <i>tdcA</i> | Threonine catabolic operon transcriptional activator                                         | 22.8 | 0.043 | 4.8  | 0.144 |
| <i>adh</i>  | Alcohol dehydrogenase                                                                        | 22.3 | 0.547 | 20.8 | 0.605 |
| <i>fndI</i> | Formate dehydrogenase N gamma subunit                                                        | 22.3 | 0.046 | 36.0 | 0.006 |
| <i>mglA</i> | Galactose/methyl galactoside ABC transport system, ATP-binding protein                       | 22.0 | 0.048 | 8.5  | 0.064 |
| <i>yihP</i> | Glucuronide transport protein                                                                | 22.0 | 0.074 | 0.5  | 0.796 |
| <i>gutM</i> | Glucitol operon activator protein                                                            | 21.8 | 0.041 | 49.2 | 0.003 |

|             |                                                                  |      |       |       |       |
|-------------|------------------------------------------------------------------|------|-------|-------|-------|
| <i>rbsB</i> | Ribose ABC transport system, periplasmic ribose- binding protein | 21.7 | 0.627 | 28.1  | 0.745 |
| <i>gne</i>  | UDP-N-acetylglucosamine 4-epimerase                              | 21.5 | 0.747 | 15.9  | 0.692 |
| <i>uxaC</i> | Uronate isomerase                                                | 21.4 | 0.127 | 7.5   | 0.091 |
| <i>malT</i> | Transcriptional activator of maltose regulon                     | 21.4 | 0.563 | 18.2  | 0.036 |
| <i>fdoH</i> | Formate dehydrogenase O beta subunit                             | 21.3 | 0.059 | 53.5  | 0.005 |
| <i>agp</i>  | Glucose-1-phosphatase                                            | 21.2 | 0.546 | 18.7  | 0.033 |
| <i>xanP</i> | Xanthine permease                                                | 21.0 | 0.081 | 13.2  | 0.032 |
| <i>gadB</i> | Glutamate decarboxylase                                          | 20.9 | 0.056 | 4.2   | 0.172 |
| <i>pepE</i> | Alpha-aspartyl dipeptidase Peptidase E                           | 20.8 | 0.051 | 31.3  | 0.008 |
| <i>gutQ</i> | D-arabinose 5-phosphate isomerases                               | 20.7 | 0.067 | 12.3  | 0.038 |
| <i>agaZ</i> | Tagatose-6-phosphate kinase                                      | 20.5 | 0.040 | 2.9   | 0.245 |
| <i>srlR</i> | Glucitol operon repressor                                        | 20.2 | 0.062 | 15.1  | 0.026 |
| <i>talA</i> | Transaldolase                                                    | 20.2 | 0.039 | 6.8   | 0.086 |
| <i>fndG</i> | Formate dehydrogenase N alpha subunit                            | 19.6 | 0.085 | 100.9 | 0.004 |
| <i>gatY</i> | Tagatose-1,6-bisphosphate aldolase                               | 19.3 | 0.745 | 19.9  | 0.732 |
| <i>tdcE</i> | Pyruvate formate-lyase                                           | 19.3 | 0.060 | 32.7  | 0.012 |
| <i>sdhB</i> | Succinate dehydrogenase iron-sulfur protein                      | 19.1 | 0.881 | 19.6  | 0.753 |
| <i>dcuC</i> | C4-dicarboxylate transporter                                     | 19.1 | 0.051 | 15.8  | 0.024 |
| <i>gcvT</i> | Glycine cleavage system H protein                                | 19.0 | 0.831 | 16.6  | 0.041 |
| <i>yihT</i> | Aldolase                                                         | 19.0 | 0.048 | 1.5   | 0.524 |
| <i>fucO</i> | Lactaldehyde reductase                                           | 18.9 | 0.052 | 14.3  | 0.029 |
| <i>IUNH</i> | Inosine-uridine preferring nucleoside hydrolase                  | 18.0 | 0.219 | 7.8   | 0.087 |
| <i>fliS</i> | Flagellar biosynthesis protein                                   | 18.0 | 0.108 | 4.6   | 0.189 |
| <i>molR</i> | Molybdate metabolism regulator                                   | 18.0 | 0.108 | 0.7   | 0.959 |
| <i>yfaW</i> | Uncharacterized protein                                          | 17.7 | 0.048 | 12.8  | 0.036 |
| <i>fliN</i> | Flagellar motor switch protein                                   | 17.2 | 0.056 | 47.5  | 0.005 |
| <i>glpK</i> | Glycerol kinase                                                  | 16.9 | 0.920 | 26.8  | 0.814 |
| <i>nanE</i> | N-acetylmannosamine-6-phosphate 2-epimerase                      | 16.9 | 0.069 | 6.6   | 0.092 |
| <i>fliF</i> | Flagellar M-ring protein                                         | 16.8 | 0.053 | 15.1  | 0.029 |
| <i>lsrG</i> | Autoinducer 2 (AI-2) modifying protein                           | 16.6 | 0.061 | 8.6   | 0.062 |
| <i>araE</i> | Arabinose-proton symporter                                       | 16.2 | 0.878 | 5.6   | 0.112 |
| <i>xylG</i> | D-xylose transport ATP-binding protein                           | 16.2 | 0.055 | 5.4   | 0.108 |
| <i>nrfA</i> | Cytochrome c552 precursor                                        | 16.2 | 0.080 | 24.1  | 0.014 |
| <i>aldA</i> | Glycolaldehyde dehydrogenase                                     | 15.9 | 0.153 | 41.9  | 0.010 |
| <i>rbsK</i> | Ribokinase                                                       | 15.9 | 0.890 | 13.0  | 0.051 |

|             |                                                                                  |      |       |      |       |
|-------------|----------------------------------------------------------------------------------|------|-------|------|-------|
| <i>ydcE</i> | Probable tautomerase                                                             | 15.9 | 0.057 | 3.4  | 0.210 |
| <i>hdeA</i> | chaperone                                                                        | 15.6 | 1.000 | 2.7  | 0.325 |
| <i>rspA</i> | Starvation sensing protein                                                       | 15.5 | 0.077 | 3.6  | 0.239 |
| <i>flgF</i> | Flagellar basal-body rod protein                                                 | 15.5 | 0.064 | 25.6 | 0.013 |
| <i>dmsB</i> | Anaerobic dimethyl sulfoxide reductase chain B                                   | 15.3 | 0.081 | 47.1 | 0.005 |
| <i>csiE</i> | Stationary phase inducible protein                                               | 15.2 | 0.323 | 9.2  | 0.070 |
| <i>rbsC</i> | Ribose ABC transport system, permease protein                                    | 15.1 | 0.865 | 11.9 | 0.624 |
| <i>gldA</i> | Glycerol dehydrogenase                                                           | 15.1 | 0.134 | 14.6 | 0.033 |
| <i>ygeW</i> | Aspartate/ornithine carbamoyltransferase family protein protein                  | 15.1 | 0.063 | 91.6 | 0.002 |
| <i>uxaA</i> | Altronate hydrolase                                                              | 15.0 | 0.138 | 7.6  | 0.082 |
| <i>hdeD</i> | Membrane transporter                                                             | 14.8 | 0.154 | 1.4  | 0.605 |
| <i>dapA</i> | Dihydrodipicolinate synthase                                                     | 14.8 | 0.846 | 16.1 | 0.747 |
| <i>yegT</i> | Putative nucleoside transporter                                                  | 14.8 | 0.067 | 7.4  | 0.077 |
| <i>pstI</i> | Phosphoenolpyruvate-protein phosphotransferase of PTS system                     | 14.8 | 0.065 | 2.9  | 0.274 |
| <i>zraP</i> | Zinc resistance-associated protein                                               | 14.6 | 0.218 | 5.0  | 0.127 |
| <i>rhaR</i> | L-rhamnose operon transcriptional activator                                      | 14.6 | 0.063 | 1.0  | 0.806 |
| <i>uidB</i> | Glucuronide transporter                                                          | 14.6 | 0.064 | 6.6  | 0.088 |
| <i>gntP</i> | Fructuronate transporter                                                         | 14.6 | 0.074 | 7.2  | 0.086 |
| <i>ykgF</i> | Predicted L-lactate dehydrogenase, Iron-sulfur cluster-binding subunit           | 14.4 | 0.090 | 25.9 | 0.015 |
| <i>yhjA</i> | Cytochrome c551 peroxidase                                                       | 14.4 | 0.072 | 8.1  | 0.073 |
| <i>fliO</i> | Flagellar biosynthesis protein                                                   | 13.8 | 0.076 | 18.0 | 0.017 |
| <i>hoxL</i> | Uptake hydrogenase large subunit                                                 | 13.8 | 0.087 | 17.4 | 0.023 |
| <i>melB</i> | Melibiose carrier protein, Na <sup>+</sup> /melibiose symporter                  | 13.8 | 0.073 | 5.9  | 0.110 |
| <i>dctA</i> | Aerobic C4-dicarboxylate transporter for fumarate, L-malate, D-malate, succinate | 13.7 | 0.200 | 4.7  | 0.166 |
| <i>hdeB</i> | Chaperone                                                                        | 13.5 | 0.206 | 2.2  | 0.385 |
| <i>atoC</i> | Acetoacetate metabolism regulatory protein                                       | 13.5 | 0.076 | 13.6 | 0.035 |
| <i>murQ</i> | N-acetylmuramic acid 6-phosphate etherase                                        | 13.4 | 0.081 | 13.4 | 0.034 |
| <i>yfaX</i> | Uncharacterized transcriptional regulator                                        | 13.3 | 0.080 | 1.5  | 0.529 |
| <i>hybF</i> | [NiFe] hydrogenase nickel incorporation protein                                  | 13.3 | 0.081 | 4.9  | 0.142 |
|             | Transcriptional regulator, IclR family                                           | 13.3 | 0.080 | 2.1  | 0.400 |
| <i>gadA</i> | Glutamate decarboxylase                                                          | 13.2 | 0.084 | 2.4  | 0.339 |
| <i>ucpA</i> | Oxidoreductase                                                                   | 13.2 | 0.582 | 9.2  | 0.080 |
| <i>gcvP</i> | Glycine dehydrogenase                                                            | 13.1 | 0.887 | 22.3 | 0.791 |
| <i>atoS</i> | Sensory histidine kinase                                                         | 13.1 | 0.080 | 12.4 | 0.040 |

|             |                                                                                                     |      |       |      |       |
|-------------|-----------------------------------------------------------------------------------------------------|------|-------|------|-------|
| <i>cusC</i> | Cation efflux system protein                                                                        | 13.1 | 0.197 | 0.4  | 0.631 |
| <i>gadW</i> | HTH-type transcriptional regulator                                                                  | 13.0 | 0.083 | 1.6  | 0.538 |
| <i>frdA</i> | Fumarate reductase subunit C                                                                        | 12.9 | 0.304 | 13.5 | 0.042 |
| <i>dppA</i> | Dipeptide-binding ABC transporter, periplasmic substrate-binding component                          | 12.9 | 0.268 | 9.8  | 0.061 |
| <i>malP</i> | Maltodextrin phosphorylase                                                                          | 12.9 | 0.998 | 11.3 | 0.063 |
| <i>acrB</i> | Membrane fusion protein of RND family multidrug efflux pump                                         | 12.9 | 0.105 | 4.1  | 0.180 |
| <i>cydA</i> | Cytochrome d ubiquinol oxidase subunit I                                                            | 12.8 | 0.778 | 20.2 | 0.786 |
| <i>lsrB</i> | Autoinducer 2 (AI-2) ABC transport system, fused AI2 transporter subunits and ATP-binding component | 12.8 | 0.079 | 5.5  | 0.101 |
| <i>melA</i> | Alpha-galactosidase                                                                                 | 12.8 | 0.095 | 8.6  | 0.061 |
| <i>uspG</i> | Universal stress protein G                                                                          | 12.6 | 0.171 | 15.4 | 0.026 |
| <i>sdaC</i> | Serine transporter                                                                                  | 12.6 | 0.123 | 12.8 | 0.035 |
| <i>yphF</i> | Predicted sugar ABC transport system, periplasmic binding protein                                   | 12.6 | 0.088 | 5.5  | 0.133 |
| <i>eutQ</i> | Ethanolamine utilization protein                                                                    | 12.5 | 0.116 | 3.4  | 0.205 |
| <i>nikC</i> | Nickel transport system permease protein                                                            | 12.4 | 0.085 | 9.0  | 0.058 |
| <i>uxaB</i> | Altronate oxidoreductase                                                                            | 12.3 | 0.107 | 5.8  | 0.108 |
| <i>tdcG</i> | Predicted L-serine dehydratase                                                                      | 12.2 | 0.087 | 13.9 | 0.030 |
| <i>fliQ</i> | Flagellar biosynthesis protein                                                                      | 12.0 | 0.168 | 5.5  | 0.133 |
| <i>wrbA</i> | Flavoprotein                                                                                        | 11.8 | 0.878 | 14.2 | 0.053 |
| <i>acs</i>  | Acetyl-coenzyme A synthetase                                                                        | 11.8 | 0.106 | 20.0 | 0.023 |

SI Table 4.  $\phi 24_B$  gene expression upon norfloxacin treatment.

| Gene                      | Function                                     | Fold change | Pvalue |
|---------------------------|----------------------------------------------|-------------|--------|
| <i>vb 24B+1c</i>          | Unknown                                      | 72.34       | 0.007  |
| <i>vb 24B+2c</i>          | Unknown                                      | 73.34       | 0.009  |
| <i>vb 24B+4c</i>          | Unknown                                      | 105.44      | 0.004  |
| <i>vb 24B+5c</i>          | Unknown                                      | 99.73       | 0.001  |
| <i>vb 24B+7c</i>          | Unknown                                      | 72.53       | 0.007  |
| <i>vb 24B+8c</i>          | Unknown                                      | 111.42      | 0.003  |
| <i>vb 24B+9c</i>          | Unknown                                      | 119.5       | 0.001  |
| <i>vb 24B+14</i>          | Unknown                                      | 103.38      | 0.001  |
| <i>vb 24B+15</i>          | Unknown                                      | 94.57       | 0.001  |
| <i>vb 24B+16</i>          | Unknown                                      | 141         | 0.000  |
| <i>vb 24B+17</i>          | Unknown                                      | 36.35       | 0.002  |
| <i>vb 24B+23</i>          | Unknown                                      | 38.73       | 0.009  |
| <i>vb 24B+26</i>          | Unknown                                      | 90.4        | 0.001  |
| <i>vb 24B+31</i>          | Unknown                                      | 28.12       | 0.011  |
| <i>vb 24B+33</i>          | adaptive-response sensory kinase             | 51.93       | 0.008  |
| <i>vb 24B+34</i>          | Unknown                                      | 51.01       | 0.011  |
| <i>vb 24B+35</i>          | Unknown                                      | 51.94       | 0.005  |
| <i>vb 24B+36</i>          | Unknown                                      | 21.75       | 0.023  |
| <i>vb 24B+39</i>          | Unknown                                      | 22.32       | 0.021  |
| <i>vb 24B+40</i>          | Unknown                                      | 15.5        | 0.023  |
| <i>vb 24B+41</i>          | Unknown                                      | 15.82       | 0.010  |
| <i>vb 24B+41</i>          | Unknown                                      | 15.72       | 0.011  |
| <i>vb 24B+44</i>          | Unknown                                      | 8.34        | 0.039  |
| <i>vb 24B+45</i>          | Unknown                                      | 7.01        | 0.047  |
| <i>vb 24B+52c</i>         | Unknown                                      | 10.5        | 0.023  |
| <i>ninA</i>               | Uncharacterized phage-encoded protein        | 71.33       | 0.000  |
| <i>ninB</i>               | putative DNA N-6-adenosine methyltransferase | 68.94       | 0.009  |
| <i>ninG</i>               | putative recombination endonuclease          | 124.02      | 0.003  |
| <i>ninH</i>               | Uncharacterized phage-encoded protein        | 89.9        | 0.000  |
| <i>ninE</i>               | Uncharacterized phage-encoded protein        | 143.07      | 0.000  |
| <i>S</i>                  | Host cell lysis                              | 133.64      | 0.002  |
| <i>R</i>                  | Associated with endolysin/autolysin          | 118         | 0.003  |
| <i>Q</i>                  | Antiterminator                               | 50.93       | 0.005  |
| <i>stx</i>                | Shiga toxin                                  | 95.77       | 0.000  |
| <i>cII</i>                | Transcriptional activator                    | 47.45       | 0.002  |
| <i>cIII</i>               | Regulatory protein                           | 70.35       | 0.002  |
| <i>cro</i>                | Transcriptional activator/repressor          | 44.9        | 0.008  |
| <i>d ant</i>              |                                              | 95.60       | 0.004  |
| <i>ant</i>                | Uncharacterized protein                      | 27.32       | 0.018  |
| <i>roi</i>                | Uncharacterized protein                      | 88.55       | 0.003  |
| <i>Rz</i>                 | Host cell lysis                              | 49.73       | 0.005  |
| <i>Rz1</i>                | Host cell lysis                              | 86.33       | 0.000  |
| <i>kil</i>                | Host killing; lambda Kil superfamily         | 83.63       | 0.003  |
| <i>hyp+c4-zinc+finger</i> | Unknown                                      | 76.01       | 0.006  |
| <i>Sterm</i>              | Terminase, small subunit                     | 74.9        | 0.004  |
| <i>lar</i>                | putative restriction alleviation protein     | 63.84       | 0.004  |
| <i>hyp+33</i>             | Unknown                                      | 49.84       | 0.005  |
| <i>xis</i>                | excisionase                                  | 51.16       | 0.002  |
| <i>hyp+DAM</i>            | Unknown                                      | 101.17      | 0.004  |
| <i>vb 24B+3c</i>          | Unknown                                      | 76.35       | 0.272  |

|                   |                                                                       |        |       |
|-------------------|-----------------------------------------------------------------------|--------|-------|
| <i>vb_24B+10</i>  | Unknown                                                               | 0.6    | 0.272 |
| <i>vb_24B+11c</i> | Unknown                                                               | 43.17  | 0.273 |
| <i>vb_24B+12c</i> | Unknown                                                               | 3.63   | 0.141 |
| <i>vb_24B+19c</i> | Unknown                                                               | 1.63   | 0.400 |
| <i>vb_24B+20c</i> | Unknown                                                               | 3.44   | 0.136 |
| <i>vb_24B+24</i>  | Unknown                                                               | 47.3   | 0.626 |
| <i>vb_24B+27c</i> | Unknown                                                               | 1      | 1     |
| <i>vb_24B+28</i>  | Unknown                                                               | 49.01  | 0.837 |
| <i>vb_24B+29</i>  | Unknown                                                               | 31.71  | 0.623 |
| <i>vb_24B+30c</i> | Unknown                                                               | 0.81   | 0.848 |
| <i>vb_24B+32c</i> | Unknown                                                               | 1      | 0.797 |
| <i>Lterm</i>      | Terminase, large subunit                                              | 39.17  | 0.132 |
| <i>vb_24B+37c</i> | Unknown                                                               | 1.63   | 0.400 |
| <i>vb_24B+47</i>  | Unknown                                                               | 7.30   | 0.059 |
| <i>vb_24B+48</i>  | Unknown                                                               | 5.63   | 0.309 |
| <i>vb_24B+51c</i> | Unknown                                                               | 0.71   | 0.879 |
| <i>Int</i>        | Integrase                                                             | 1.73   | 0.271 |
| <i>vb_24B+6c</i>  | Unknown                                                               | 87.75  | 0.272 |
| <i>res</i>        | putative holliday junction resolvase                                  | 1.16   | 0.532 |
| <i>vb_24B+13c</i> | Unknown                                                               | 0.65   | 0.908 |
| <i>exo</i>        | Exonuclease                                                           | 98.02  | 0.273 |
| <i>bet</i>        | possesses large RecT domain                                           | 89.25  | 0.273 |
| <i>gam</i>        | Host nuclease inhibitor protein                                       | 136.73 | 0.273 |
| <i>ssb</i>        | putative single-stranded DNA binding protein                          | 78.65  | 0.273 |
| <i>stk</i>        | Serine/Threonine protein kinases                                      | 1.81   | 0.329 |
| <i>bor</i>        | lambda <i>bor</i> increases the resistance of <i>E. coli</i> to serum | 1.43   | 0.443 |
| <i>cI</i>         | repressor protein                                                     | 1.23   | 0.446 |
| <i>lom</i>        | Outer membrane protein beta-barrel domain                             | 3.00   | 0.140 |
| <i>port</i>       | putative portal protein                                               | 29.89  | 0.526 |
| <i>O</i>          | DNA replication protein                                               | 64.99  | 0.606 |
| <i>N</i>          | anti-terminator                                                       | 47.46  | 0.736 |
| <i>vb_24B+21</i>  | Unknown                                                               | 23.99  | 0.745 |
| <i>P</i>          | DNA replication protein                                               | 42.22  | 0.804 |



## Referecnes:

1. **James CE, Stanley KN, Allison HE, Flint HJ, Stewart CS, Sharp RJ, Saunders JR, McCarthy AJ.** 2001. Lytic and lysogenic infection of diverse *Escherichia coli* and *Shigella* strains with a verocytotoxigenic bacteriophage. *Appl. Environ. Microbiol.* **67**:4335–4337.
2. **Campellone KG, Roe AJ, Løbner-Olesen A, Murphy KC, Magoun L, Brady MJ, Donohue-Rolfe A, Tzipori S, Gally DL, Leong JM, Marinus MG.** 2007. Increased adherence and actin pedestal formation by dam-deficient enterohaemorrhagic *Escherichia coli* O157:H7. *Molecular Microbiology* **63**:1468–1481.
3. **Fogg PCM, Rigden DJ, Saunders JR, McCarthy AJ, Allison HE.** 2011. Characterization of the relationship between integrase, excisionase and antirepressor activities associated with a superinfecting Shiga toxin encoding bacteriophage. *Nucleic Acids Res* **39**:2116–2129.
4. **Riley LM, Veses-Garcia M, Hillman JD, Handfield M, McCarthy AJ, Allison HE.** 2012. Identification of genes expressed in cultures of *E. coli* lysogens carrying the Shiga toxin-encoding prophage  $\Phi$ 24<sub>B</sub>. *BMC Microbiol* **12**:42.
5. **Rasmussen R.** 2012. Quantification of the LightCycler, pp. 21–34. *In* Meuer, S, Wittwer, C, Nakagawara, K (eds.), *Rapid cycle real-time PCR, methods and applications*. Springer Science & Business Media, Berlin Heidelberg.
